# Supplementary material for: A social exclusion perspective on loneliness in older adults in the Nordic countries
Source: PubMed Central journal article supplement (PMC9156591; doi:10.1007/s10433-022-00692-4), 2022-03-29
Supplement: 10433_2022_692_MOESM1_ESM.pdf [file 10433_2022_692_MOESM1_ESM.pdf]

**Supplementary material:** Supplementary data

**Title:** A social exclusion perspective on loneliness in older adults in the Nordic countries

**Content**

Supplementary Table 1: Categories of loneliness per country and survey wave, weighted number of observations

**Supplementary table 1.** Categories of loneliness per country and survey wave, weighted percentages. Percent (lower confidence interval, upper confidence interval).

| <b>Country</b> | <b>Wave (year)</b> | <b>n</b> | <b>None or almost none of the time</b> | <b>Some of the time</b> | <b>Most of the time</b> | <b>All or almost all the time</b> |
|----------------|--------------------|----------|----------------------------------------|-------------------------|-------------------------|-----------------------------------|
| Denmark        | 3 (2006)           | 363      | 82.6 (78.9, 86.4)                      | 14.0 (10.3, 17.8)       | 1.4 (-2.3, 5.1)         | 1.9 (-1.8, 5.7)                   |
| Denmark        | 5 (2010)           | 382      | 83.5 (79.8, 87.2)                      | 14.4 (10.7, 18.1)       | 1.3 (-2.4, 5.0)         | 0.8 (-2.9, 4.5)                   |
| Denmark        | 6 (2012)           | 386      | 84.2 (80.5, 87.9)                      | 11.4 (7.7, 15.1)        | 2.6 (-1.1, 6.3)         | 1.8 (-1.9, 5.5)                   |
| Denmark        | 7 (2014)           | 388      | 83.8 (80.0, 87.5)                      | 13.9 (10.2, 17.6)       | 0.8 (-2.9, 4.5)         | 1.5 (-2.2, 5.3)                   |
| Finland        | 3 (2006)           | 457      | 75.3 (71.6, 79.0)                      | 19.5 (15.8, 23.2)       | 3.3 (-0.4, 7.0)         | 2.0 (-1.8, 5.7)                   |
| Finland        | 5 (2010)           | 515      | 75.7 (72.0, 79.4)                      | 20.4 (16.7, 24.1)       | 3.3 (-0.4, 7.0)         | 0.6 (-3.1, 4.3)                   |
| Finland        | 6 (2012)           | 642      | 73.8 (70.1, 77.6)                      | 19.6 (15.9, 23.3)       | 3.4 (-0.3, 7.1)         | 3.1 (-0.6, 6.8)                   |
| Finland        | 7 (2014)           | 615      | 81.8 (78.1, 85.5)                      | 14.5 (10.7, 18.2)       | 1.5 (-2.3, 5.2)         | 2.3 (-1.4, 6.0)                   |
| Norway         | 3 (2006)           | 404      | 77.5 (73.8, 81.2)                      | 17.6 (13.9, 21.3)       | 4.2 (0.5, 7.9)          | 0.7 (-3.0, 4.5)                   |
| Norway         | 5 (2010)           | 365      | 82.2 (78.5, 85.9)                      | 14.8 (11.1, 18.5)       | 1.9 (-1.8, 5.6)         | 1.1 (-2.6, 4.8)                   |
| Norway         | 6 (2012)           | 384      | 83.6 (79.9, 87.3)                      | 15.1 (11.4, 18.8)       | 0.5 (-3.2, 4.2)         | 0.8 (-2.9, 4.5)                   |
| Norway         | 7 (2014)           | 374      | 81.8 (78.1, 85.5)                      | 15.0 (11.3, 18.7)       | 2.1 (-1.6, 5.9)         | 1.1 (-2.7, 4.8)                   |
| Sweden         | 3 (2006)           | 509      | 77.2 (73.5, 80.9)                      | 17.1 (13.4, 20.8)       | 3.3 (-0.4, 7.1)         | 2.4 (-1.4, 6.1)                   |
| Sweden         | 5 (2010)           | 414      | 76.6 (72.8, 80.3)                      | 17.1 (13.4, 20.9)       | 4.3 (0.6, 8.1)          | 1.9 (-1.8, 5.7)                   |
| Sweden         | 6 (2012)           | 532      | 76.9 (73.2, 80.6)                      | 18.4 (14.7, 22.1)       | 2.6 (-1.1, 6.4)         | 2.1 (-1.7, 5.8)                   |
| Sweden         | 7 (2014)           | 520      | 75.0 (71.3, 78.7)                      | 19.2 (15.5, 23.0)       | 3.5 (-0.3, 7.2)         | 2.3 (-1.4, 6.0)                   |
